# Supplementary material for: Quaking and miR-155 interactions in inflammation and leukemogenesis
Source: PubMed Central journal article supplement (PMC4694781; doi:10.18632/oncotarget.5248), 2015-08-24
Supplement: oncotarget-06-24599-s001.pdf [file oncotarget-06-24599-s001.pdf]

# Quaking and *miR-155* interactions in inflammation and leukemogenesis

Supplementary Information

**Supplementary Table 1.** Information about reagents used in this study

| <i>Catalog number</i> | <i>Item</i>                                                             | <i>Manufacturer/Supplier</i>   |
|-----------------------|-------------------------------------------------------------------------|--------------------------------|
| Hs00236330_m1         | FasL Taqman gene expression assay                                       | Life Technologies              |
| Hs00287641_m1         | QKI (probe spans exon 4-5 boundary) Taqman gene expression assay        | Life Technologies              |
| Hs01374569_m1         | MIR155HG Taqman gene expression assay                                   | Life Technologies              |
| Hs00427923_m1         | OAZ1 Taqman gene expression assay                                       | Life Technologies              |
| Mm00498991_m1         | Qk (probe spans exon 4-5 boundary) Taqman gene expression assay         | Life Technologies              |
| Mm00607939_s1         | Actin- $\beta$ Taqman gene expression assay                             | Life Technologies              |
| Mm00443258_m1         | Tnf Taqman gene expression assay                                        | Life Technologies              |
| Mm01716204_m1         | LOC100653389 Taqman gene expression assay                               | Life Technologies              |
| 001094                | Control miRNA Assay RNU44                                               | Life Technologies              |
| 001006                | Control miRNA Assay RNU48                                               | Life Technologies              |
| 001093                | Control miRNA Assay RNU6B                                               | Life Technologies              |
| 002623                | Hsa-miR-155 Taqman miRNA assay                                          | Life Technologies              |
| 002571                | Mmu-miR-155 Taqman miRNA assay                                          | Life Technologies              |
| 001973                | Control miRNA Assay U6 snRNA                                            | Life Technologies              |
| 001093                | Control miRNA Assay RNU6B                                               | Life Technologies              |
| PA5-21559             | IRAK3 antibody                                                          | Life Technologies              |
| 9216                  | Phospho-p38 MAPK (Thr180/Tyr182) (28B10) Mouse                          | Cell Signaling Technologies    |
| 9212                  | p38 MAPK Antibody                                                       | Cell Signaling Technologies    |
| sc-7972               | p38 MAPK Antibody                                                       | Santa Cruz Biotechnology, Inc. |
| 9106                  | Phospho-p44/42 MAPK (Erk1/2) (Thr202/Tyr204) (E10) Mouse mAb            | Cell Signaling Technologies    |
| 9107                  | p44/42 MAPK (Erk1/2) (3A7) Antibody                                     | Cell Signaling Technologies    |
| 9251                  | Phospho-SAPK/JNK Antibody                                               | Cell Signaling Technologies    |
| 9252                  | SAPK/JNK Antibody                                                       | Santa Cruz Biotechnology, Inc. |
| sc-7345               | JNK-2 Antibody                                                          | Santa Cruz Biotechnology, Inc. |
| sc-25336              | vinculin (H-10) Antibody                                                | Santa Cruz Biotechnology, Inc. |
| 9099                  | $\alpha$ -Tubulin (11H10)                                               | Cell Signaling Technologies    |
| ab-3280               | Actin beta antibody                                                     | Abcam                          |
| A300-183A             | QKI antibody                                                            | Bethyl Laboratories, Inc.      |
| 1299001               | Stealth siRNA against hQKI HSS114040                                    | Invitrogen/Life technologies   |
| 1299001               | Stealth siRNA against hQKI HSS114042                                    | Invitrogen/Life technologies   |
| PM13058               | Pre-miRmiRNA Precursors mmu-miR-155                                     | Ambion/Life technologies       |
| AM13058               | Anti-miR miRNA Inhibitors mmu-miR-155-5p                                | Ambion/Life technologies       |
| AM17110               | Pre-miR <sup>TM</sup> miRNA Precursor Negative Control #1               | Ambion/Life technologies       |
| AM17010               | Anti-miR <sup>TM</sup> miRNA Inhibitor Negative Control #1              | Ambion/Life technologies       |
| AM12601               | Pre-miRmiRNA Precursors Hsa-miR-155                                     | Ambion/Life technologies       |
| PM12601               | Anti-miR miRNA Inhibitors Hsa-miR-155-5p                                | Ambion/Life technologies       |
| S711421               | Promoter QKI                                                            | SwitchGear                     |
| G8090                 | Caspase-Glo <sup>®</sup> 3/7 Assay                                      | Promega                        |
| MEM-004A              | Mouse Inflammatory Cytokines Multi-Analyte ELISArray <sup>TM</sup> Kits | SABiosciences /Qiagen          |

**Supplementary Table 2.** The hundred most significant target transcripts whose expression in MEC2 CLL cells changed following transfection by siRNAs to *QKI* (*siQKI*), as determined using the Targetscan program ([www.targetscan.org](http://www.targetscan.org))

| <i>Rank</i> | <i>Transcript symbol</i> | <i>Transcript name</i>                                                                         | <i>Predicted miR-155 targets</i> |
|-------------|--------------------------|------------------------------------------------------------------------------------------------|----------------------------------|
| 1           | <i>QKI</i>               | QKI, KH domain containing, RNA binding                                                         | +                                |
| 2           | <i>DHRS2</i>             | Dehydrogenase/reductase (SDR family) member 2                                                  |                                  |
| 3           | <i>GNAS</i>              | GNAS complex locus                                                                             | +                                |
| 4           | <i>LAMP2</i>             | Lysosomal-associated membrane protein 2                                                        | +                                |
| 5           | <i>DDAH1</i>             | Dimethylarginine dimethylaminohydrolase 1                                                      | +                                |
| 6           | <i>RARA</i>              | Retinoic acid receptor, alpha                                                                  |                                  |
| 7           | <i>BIVM</i>              | Basic, immunoglobulin-like variable motif containing                                           |                                  |
| 8           | <i>GATM</i>              | Glycine amidinotransferase (L-arginine:glycine amidinotransferase)                             | +                                |
| 9           | <i>ADRBK2</i>            | Adrenergic, beta, receptor kinase 2                                                            | +                                |
| 10          | <i>CADM1</i>             | Cell adhesion molecule 1                                                                       |                                  |
| 11          | <i>CD109</i>             | CD109 molecule                                                                                 | +                                |
| 12          | <i>VPREB3</i>            | Pre-B lymphocyte 3                                                                             |                                  |
| 13          | <i>PLEKHB2</i>           | Pleckstrin homology domain containing, family B (evectins) member 2                            | +                                |
| 14          | <i>CCDC50</i>            | Coiled-coil domain containing 50                                                               | +                                |
| 15          | <i>ARHGAP32</i>          | Rho GTPase activating protein 32                                                               | +                                |
| 16          | <i>IFI44</i>             | Interferon-induced protein 44                                                                  |                                  |
| 17          | <i>AIF1</i>              | Allograft inflammatory factor 1                                                                |                                  |
| 18          | <i>PHTF2</i>             | Putative homeodomain transcription factor 2                                                    |                                  |
| 19          | <i>ICK</i>               | Intestinal cell (MAK-like) kinase                                                              |                                  |
| 20          | <i>CCDC88A</i>           | Coiled-coil domain containing 88A                                                              |                                  |
| 21          | <i>ADAM17</i>            | ADAM metallopeptidase domain 17                                                                |                                  |
| 22          | <i>SOS1</i>              | Son of sevenless homolog 1 (Drosophila)                                                        | +                                |
| 23          | <i>ZC3HAV1L</i>          | Zinc finger CCCH-type, antiviral 1-like                                                        |                                  |
| 24          | <i>PTPN3</i>             | Protein tyrosine phosphatase, non-receptor type 3                                              |                                  |
| 25          | <i>SRGAP2C</i>           | SLIT-ROBO Rho GTPase activating protein 2C                                                     |                                  |
| 26          | <i>NEDD4</i>             | Neural precursor cell expressed, developmentally down-regulated 4, E3 ubiquitin protein ligase |                                  |
| 27          | <i>MAPT</i>              | Microtubule-associated protein tau                                                             |                                  |
| 28          | <i>FCRLA</i>             | Fc receptor-like A                                                                             | +                                |
| 29          | <i>CD80</i>              | CD80 molecule                                                                                  |                                  |
| 30          | <i>RNF125</i>            | Ring finger protein 125, E3 ubiquitin protein ligase                                           |                                  |
| 31          | <i>FAM208A</i>           | Family with sequence similarity 208, member A                                                  |                                  |
| 32          | <i>FAM217B</i>           | Family with sequence similarity 217, member B                                                  | +                                |
| 33          | <i>EML4</i>              | Echinoderm microtubule associated protein like 4                                               |                                  |
| 34          | <i>ZNF785</i>            | Zinc finger protein 785                                                                        |                                  |
| 35          | <i>MCAM</i>              | Melanoma cell adhesion molecule                                                                |                                  |
| 36          | <i>P2RY10</i>            | Purinergic receptor P2Y, G-protein coupled, 10                                                 |                                  |

|    |                  |                                                                               |   |
|----|------------------|-------------------------------------------------------------------------------|---|
| 37 | <i>FAF1</i>      | Fas (TNFRSF6) associated factor 1                                             |   |
| 38 | <i>NIPSNAP3B</i> | Nipsnap homolog 3B ( <i>C. elegans</i> )                                      |   |
| 39 | <i>LRP11</i>     | Low density lipoprotein receptor-related protein 11                           |   |
| 40 | <i>IGF1</i>      | Insulin-like growth factor 1 (somatomedin C)                                  | + |
| 41 | <i>WDR41</i>     | WD repeat domain 41                                                           |   |
| 42 | <i>PLAUR</i>     | Plasminogen activator, urokinase receptor                                     |   |
| 43 | <i>PHF10</i>     | PHD finger protein 10                                                         |   |
| 44 | <i>MACC1</i>     | Metastasis associated in colon cancer 1                                       | + |
| 45 | <i>SP100</i>     | SP100 nuclear antigen                                                         |   |
| 46 | <i>RMND5A</i>    | Required for meiotic nuclear division 5 homolog A ( <i>S. cerevisiae</i> )    |   |
| 47 | <i>RSF1</i>      | Remodeling and spacing factor 1                                               |   |
| 48 | <i>YME1L1</i>    | YME1-like 1                                                                   | + |
| 49 | <i>ITPR1</i>     | Inositol 1,4,5-trisphosphate receptor, type 1                                 |   |
| 50 | <i>WDR27</i>     | WD repeat domain 27                                                           |   |
| 51 | <i>RASSF4</i>    | Ras association (RalGDS/AF-6) domain family member 4                          |   |
| 52 | <i>RALGPS2</i>   | Ral GEF with PH domain and SH3 binding motif 2                                |   |
| 53 | <i>GREB1</i>     | Growth regulation by estrogen in breast cancer 1                              |   |
| 54 | <i>PNMA2</i>     | Paraneoplastic Ma antigen 2                                                   |   |
| 55 | <i>KCNJ11</i>    | Potassium inwardly-rectifying channel, subfamily J, member 11                 |   |
| 56 | <i>NFIC</i>      | Nuclear factor I/C (CCAAT-binding transcription factor)                       |   |
| 57 | <i>SSBP3</i>     | Single stranded DNA binding protein 3                                         |   |
| 58 | <i>SCN3A</i>     | Sodium channel, voltage-gated, type III, alpha subunit                        |   |
| 59 | <i>ACVR2B</i>    | Activin A receptor, type IIB                                                  | + |
| 60 | <i>MAP9</i>      | Microtubule-associated protein 9                                              | + |
| 61 | <i>PLEKHG4</i>   | Pleckstrin homology domain containing, family G (with RhoGef domain) member 4 |   |
| 62 | <i>FAM49A</i>    | Family with sequence similarity 49, member A                                  |   |
| 63 | <i>TBC1D30</i>   | TBC1 domain family, member 30                                                 | + |
| 64 | <i>TWF1</i>      | Twinfilin, actin-binding protein, homolog 1 ( <i>Drosophila</i> )             | + |
| 65 | <i>ABAT</i>      | 4-aminobutyrate aminotransferase                                              | + |
| 66 | <i>CSDA</i>      | Cold shock domain protein A                                                   |   |
| 67 | <i>SLA</i>       | Src-like-adaptor                                                              | + |
| 68 | <i>ATP7B</i>     | ATPase, Cu <sup>++</sup> transporting, beta polypeptide                       |   |
| 69 | <i>YES1</i>      | v-yes-1 Yamaguchi sarcoma viral oncogene homolog 1                            | + |
| 70 | <i>GDA</i>       | Guanine deaminase                                                             |   |
| 71 | <i>LOXL2</i>     | Lysyl oxidase-like 2                                                          |   |
| 72 | <i>IGF2BP1</i>   | Insulin-like growth factor 2 mRNA binding protein 1                           |   |
| 73 | <i>TBRG1</i>     | Transforming growth factor beta regulator 1                                   | + |
| 74 | <i>RLN2</i>      | Relaxin 2                                                                     |   |
| 75 | <i>PICALM</i>    | Phosphatidylinositol binding clathrin assembly protein                        | + |
| 76 | <i>JAG1</i>      | Jagged 1                                                                      |   |
| 77 | <i>TMX4</i>      | Thioredoxin-related transmembrane protein 4                                   |   |
| 78 | <i>PXDN</i>      | Peroxidasin homolog ( <i>Drosophila</i> )                                     |   |
| 79 | <i>SIGLEC10</i>  | Sialic acid binding Ig-like lectin 10                                         |   |

|     |                 |                                                                                                         |   |
|-----|-----------------|---------------------------------------------------------------------------------------------------------|---|
| 80  | <i>AKD1</i>     | Adenylate kinase domain containing 1                                                                    |   |
| 81  | <i>CCR10</i>    | Chemokine (C-C motif) receptor 10                                                                       |   |
| 82  | <i>KMO</i>      | Kynurenine 3-monooxygenase (kynurenine 3-hydroxylase)                                                   |   |
| 83  | <i>RASGRF1</i>  | Ras protein-specific guanine nucleotide-releasing factor 1                                              |   |
| 84  | <i>CTBP2</i>    | C-terminal binding protein 2                                                                            |   |
| 85  | <i>PAG1</i>     | Phosphoprotein associated with glycosphingolipid microdomains 1                                         | + |
| 86  | <i>PITPNC1</i>  | Phosphatidylinositol transfer protein, cytoplasmic 1                                                    |   |
| 87  | <i>TDRD12</i>   | Tudor domain containing 12                                                                              |   |
| 88  | <i>IRAK3</i>    | Interleukin-1 receptor-associated kinase 3                                                              |   |
| 89  | <i>CDC42SE2</i> | CDC42 small effector 2                                                                                  | + |
| 90  | <i>CXCR5</i>    | Chemokine (C-X-C motif) receptor 5                                                                      |   |
| 91  | <i>C7orf41</i>  | Chromosome 7 open reading frame 41                                                                      | + |
| 92  | <i>ST3GAL6</i>  | ST3 beta-galactoside alpha-2,3-sialyltransferase 6                                                      |   |
| 93  | <i>TWSG1</i>    | Twisted gastrulation homolog 1 (Drosophila)                                                             | + |
| 94  | <i>TUFT1</i>    | Tuftelin 1                                                                                              |   |
| 95  | <i>SLC1A1</i>   | Solute carrier family 1 (neuronal/epithelial high affinity glutamate transporter, system Xag), member 1 |   |
| 96  | <i>SRSF6</i>    | Serine/arginine-rich splicing factor 6                                                                  |   |
| 97  | <i>MCOLN3</i>   | Mucolipin 3                                                                                             |   |
| 98  | <i>LY9</i>      | Lymphocyte antigen 9                                                                                    |   |
| 99  | <i>CNFN</i>     | Cornifelin                                                                                              |   |
| 100 | <i>SORL1</i>    | Sortilin-related receptor, L (DLR class) A repeats containing                                           | + |

**Supplementary Table 3.** The hundred most significant target transcripts whose expression in BJAB Burkitt's lymphoma cells changed following transfection by siRNAs to *QKI* (*siQKI*), as determined using the Targetscan program ([www.targetscan.org](http://www.targetscan.org))

| <i>Rank</i> | <i>Transcript symbol</i> | <i>Transcript name</i>                                                                           | <i>Predicted miR-155 targets</i> |
|-------------|--------------------------|--------------------------------------------------------------------------------------------------|----------------------------------|
| 1           | <i>QKI</i>               | QKI, KH domain containing, RNA binding                                                           | +                                |
| 2           | <i>GNAS</i>              | GNAS complex locus                                                                               | +                                |
| 3           | <i>CCDC88A</i>           | Coiled-coil domain containing 88A                                                                |                                  |
| 4           | <i>CCR7</i>              | Chemokine (C-C motif) receptor 7                                                                 |                                  |
| 5           | <i>GALNT12</i>           | UDP-N-acetyl-alpha-D-galactosamine:polypeptide N-acetylgalactosaminyltransferase 12 (GalNAc-T12) | +                                |
| 6           | <i>ZNF232</i>            | Zinc finger protein 232                                                                          |                                  |
| 7           | <i>DHRS9</i>             | Dehydrogenase/reductase (SDR family) member 9                                                    |                                  |
| 8           | <i>GJA3</i>              | Gap junction protein, alpha 3, 46kDa                                                             |                                  |
| 9           | <i>TFEC</i>              | Transcription factor EC                                                                          | +                                |
| 10          | <i>H2AFY</i>             | H2A histone family, member Y                                                                     |                                  |
| 11          | <i>SLC25A13</i>          | Solute carrier family 25 (aspartate/glutamate carrier), member 13                                |                                  |
| 12          | <i>LTB</i>               | Lymphotoxin beta (TNF superfamily, member 3)                                                     |                                  |
| 13          | <i>GCLM</i>              | Glutamate-cysteine ligase, modifier subunit                                                      |                                  |
| 14          | <i>EGR1</i>              | Early growth response 1                                                                          |                                  |
| 15          | <i>CAMSAP2</i>           | Calmodulin regulated spectrin-associated protein family, member 2                                |                                  |
| 16          | <i>ID3</i>               | Inhibitor of DNA binding 3, dominant negative helix-loop-helix protein                           |                                  |
| 17          | <i>TXLNB</i>             | Taxilin beta                                                                                     | +                                |
| 18          | <i>LRRC61</i>            | Leucine rich repeat containing 61                                                                |                                  |
| 19          | <i>NTNG1</i>             | Netrin G1                                                                                        |                                  |
| 20          | <i>CCDC74B</i>           | Coiled-coil domain containing 74B                                                                |                                  |
| 21          | <i>FSD1L</i>             | Fibronectin type III and SPRY domain containing 1-like                                           |                                  |
| 22          | <i>MLH3</i>              | MutL homolog 3 (E. coli)                                                                         |                                  |
| 23          | <i>RALGPS2</i>           | Ral GEF with PH domain and SH3 binding motif 2                                                   |                                  |
| 24          | <i>ACPP</i>              | Acid phosphatase, prostate                                                                       |                                  |
| 25          | <i>ERAP2</i>             | Endoplasmic reticulum aminopeptidase 2                                                           |                                  |
| 26          | <i>DHRS2</i>             | Dehydrogenase/reductase (SDR family) member 2                                                    |                                  |
| 27          | <i>TSEN15</i>            | TRNA splicing endonuclease 15 homolog (S. cerevisiae)                                            |                                  |
| 28          | <i>SATB1</i>             | SATB homeobox 1                                                                                  | +                                |
| 29          | <i>PIK3CG</i>            | Phosphatidylinositol-4,5-bisphosphate 3-kinase, catalytic subunit gamma                          |                                  |
| 30          | <i>VASH2</i>             | Vasohibin 2                                                                                      |                                  |
| 31          | <i>MYLIP</i>             | Myosin regulatory light chain interacting protein                                                |                                  |
| 32          | <i>GREB1</i>             | Growth regulation by estrogen in breast cancer 1                                                 |                                  |
| 33          | <i>SLC6A16</i>           | Solute carrier family 6, member 16                                                               |                                  |
| 34          | <i>HSPA13</i>            | Heat shock protein 70kDa family, member 13                                                       |                                  |
| 35          | <i>CYP1B1</i>            | Cytochrome P450, family 1, subfamily B, polypeptide 1                                            |                                  |
| 36          | <i>CD38</i>              | CD38 molecule                                                                                    | +                                |
| 37          | <i>TGFBR1</i>            | Transforming growth factor, beta receptor 1                                                      | +                                |

|    |                 |                                                                                         |   |
|----|-----------------|-----------------------------------------------------------------------------------------|---|
| 38 | <i>DCN</i>      | Decorin                                                                                 |   |
| 39 | <i>VCAM1</i>    | Vascular cell adhesion molecule 1                                                       |   |
| 40 | <i>FCRLA</i>    | Fc receptor-like A                                                                      | + |
| 41 | <i>RAC1</i>     | Ras-related C3 botulinum toxin substrate 1 (rho family, small GTP binding protein Rac1) | + |
| 42 | <i>CMPK2</i>    | Cytidine monophosphate (UMP-CMP) kinase 2, mitochondrial                                | + |
| 43 | <i>CARKD</i>    | Carbohydrate kinase domain containing                                                   |   |
| 44 | <i>PEA15</i>    | Phosphoprotein enriched in astrocytes 15                                                | + |
| 45 | <i>PICALM</i>   | Phosphatidylinositol binding clathrin assembly protein                                  | + |
| 46 | <i>ZEB2</i>     | Zinc finger E-box binding homeobox 2                                                    |   |
| 47 | <i>TOB1</i>     | Transducer of ERBB2, 1                                                                  |   |
| 48 | <i>LAMP3</i>    | Lysosomal-associated membrane protein 3                                                 |   |
| 49 | <i>RNF144A</i>  | Ring finger protein 144A                                                                |   |
| 50 | <i>IL1B</i>     | Interleukin 1, beta                                                                     |   |
| 51 | <i>CD69</i>     | CD69 molecule                                                                           |   |
| 52 | <i>TMEM123</i>  | Transmembrane protein 123                                                               | + |
| 53 | <i>FOXA3</i>    | Forkhead box A3                                                                         |   |
| 54 | <i>CPA6</i>     | Carboxypeptidase A6                                                                     |   |
| 55 | <i>LAMP2</i>    | Lysosomal-associated membrane protein 2                                                 | + |
| 56 | <i>LAPTM4B</i>  | Lysosomal protein transmembrane 4 beta                                                  |   |
| 57 | <i>KCTD15</i>   | Potassium channel tetramerisation domain containing 15                                  |   |
| 58 | <i>ARL1</i>     | ADP-ribosylation factor-like 1                                                          | + |
| 59 | <i>KL</i>       | Klotho                                                                                  |   |
| 60 | <i>AFF1</i>     | AF4/FMR2 family, member 1                                                               | + |
| 61 | <i>SUSD1</i>    | Sushi domain containing 1                                                               |   |
| 62 | <i>KCNJ3</i>    | Potassium inwardly-rectifying channel, subfamily J, member 3                            | + |
| 63 | <i>TMX4</i>     | Thioredoxin-related transmembrane protein 4                                             |   |
| 64 | <i>RNF170</i>   | Ring finger protein 170                                                                 |   |
| 65 | <i>CSRNP3</i>   | Cysteine-serine-rich nuclear protein 3                                                  |   |
| 66 | <i>SLC28A3</i>  | Solute carrier family 28 (sodium-coupled nucleoside transporter), member 3              |   |
| 67 | <i>C11orf54</i> | Chromosome 11 open reading frame 54                                                     |   |
| 68 | <i>BTNL9</i>    | Butyrophilin-like 9                                                                     |   |
| 69 | <i>LZTS1</i>    | Leucine zipper, putative tumor suppressor 1                                             |   |
| 70 | <i>WDR76</i>    | WD repeat domain 76                                                                     |   |
| 71 | <i>TIMP1</i>    | TIMP metalloproteinase inhibitor 1                                                      |   |
| 72 | <i>USP6NL</i>   | USP6 N-terminal like                                                                    |   |
| 73 | <i>IL32</i>     | Interleukin 32                                                                          |   |
| 74 | <i>FSCN1</i>    | Fascin homolog 1, actin-bundling protein (Strongylocentrotus purpuratus)                |   |
| 75 | <i>ERMP1</i>    | Endoplasmic reticulum metalloproteinase 1                                               | + |
| 76 | <i>DYX1C1</i>   | Dyslexia susceptibility 1 candidate 1                                                   |   |
| 77 | <i>GPNMB</i>    | Glycoprotein (transmembrane) nmb                                                        |   |
| 78 | <i>IRS1</i>     | Insulin receptor substrate 1                                                            |   |
| 79 | <i>KLF9</i>     | Kruppel-like factor 9                                                                   |   |

|     |                 |                                                                                                                  |   |
|-----|-----------------|------------------------------------------------------------------------------------------------------------------|---|
| 80  | <i>SERPINA9</i> | Serpin peptidase inhibitor, clade A (alpha-1 antiproteinase, antitrypsin), member 9                              |   |
| 81  | <i>KIAA2022</i> | KIAA2022                                                                                                         | + |
| 82  | <i>PTPDC1</i>   | Protein tyrosine phosphatase domain containing 1                                                                 |   |
| 83  | <i>EPB41L4B</i> | Erythrocyte membrane protein band 4.1 like 4B                                                                    | + |
| 84  | <i>ZNF426</i>   | Zinc finger protein 426                                                                                          |   |
| 85  | <i>SOAT1</i>    | Sterol O-acyltransferase 1                                                                                       |   |
| 86  | <i>TMEM63C</i>  | Transmembrane protein 63C                                                                                        |   |
| 87  | <i>HSF2</i>     | Heat shock transcription factor 2                                                                                |   |
| 88  | <i>LRRC33</i>   | Leucine rich repeat containing 33                                                                                |   |
| 89  | <i>MYL12A</i>   | Myosin, light chain 12A, regulatory, non-sarcomeric                                                              |   |
| 90  | <i>PRDM13</i>   | PR domain containing 13                                                                                          |   |
| 91  | <i>MYO1B</i>    | Myosin IB                                                                                                        | + |
| 92  | <i>ASAP3</i>    | ArfGAP with SH3 domain, ankyrin repeat and PH domain 3                                                           |   |
| 93  | <i>TOX2</i>     | TOX high mobility group box family member 2                                                                      |   |
| 94  | <i>ZNF268</i>   | Zinc finger protein 268                                                                                          | + |
| 95  | <i>MYO7B</i>    | Myosin VIIB                                                                                                      |   |
| 96  | <i>FCRL3</i>    | Fc receptor-like 3                                                                                               |   |
| 97  | <i>SAMD9L</i>   | Sterile alpha motif domain containing 9-like                                                                     |   |
| 98  | <i>MACROD2</i>  | MACRO domain containing 2                                                                                        |   |
| 99  | <i>EVL</i>      | Enah/Vasp-like                                                                                                   |   |
| 100 | <i>SEMA4C</i>   | Sema domain, immunoglobulin domain (Ig), transmembrane domain (TM) and short cytoplasmic domain, (semaphorin) 4C |   |
